# Supplementary material for: Online protein digestion in membranes between capillary electrophoresis and mass spectrometry
Source: Royal Society of Chemistry journal article supplement (doi:10.1039/d3an00106g), 2023-01-01
Supplement: d3an00106g1.pdf [file d3an00106g1.pdf]

+

## Online Protein Digestion in Membranes Between Capillary Electrophoresis and Mass Spectrometry

Kendall A. Ryan<sup>1</sup> and Merlin L. Bruening<sup>1,2</sup>

- 
1. Department of Chemistry and Biochemistry, University of Notre Dame, Notre Dame, Indiana 46556, United States
  2. Department of Chemical and Biomolecular Engineering, University of Notre Dame, Notre Dame, Indiana 46556, United States

### Supporting Information

|                                                                                                                                                                                                                                                                                                                                                                                                                                                                                                                           |    |
|---------------------------------------------------------------------------------------------------------------------------------------------------------------------------------------------------------------------------------------------------------------------------------------------------------------------------------------------------------------------------------------------------------------------------------------------------------------------------------------------------------------------------|----|
| <b>Table S1.</b> Average intensities for a BSA peptide obtained from online digestion using a pepsin-containing membrane in the emitter tip. The emitter tip final diameter was varied between 15 and 60 $\mu\text{m}$ , and 4 emitter tips were tested for each diameter range. ....                                                                                                                                                                                                                                     | S3 |
| <b>Fig. S1</b> IDEX M-533 mini microfilter assembly modified to contain a membrane in the filter capsule for integration into 360 $\mu\text{m}$ od capillaries for CE separation. The figure is adapted from IDEX published sales literature. <sup>49</sup> .....                                                                                                                                                                                                                                                         | S3 |
| <b>Fig. S2</b> A. Glass capillary union packed with a pepsin membrane to digest proteins in-line with a CE separation. This setup yielded an unacceptably high EOF. B. Close-up view of the membrane packed into the glass union. A second capillary farther down in the union links the membrane and digested proteins to the sheath-flow ESI source. ....                                                                                                                                                               | S4 |
| <b>Table S2</b> Myoglobin sequence coverages and numbers of identified unique peptides for 20 repeat CE injections of intact equine myoglobin with all analyses using the same pepsin-containing emitter tip. A blank wash was run after the 20 <sup>th</sup> injection. The table also shows the sequence coverage and number of peptides for pepsin, which may elute from the membrane in the emitter tip.....                                                                                                          | S5 |
| <b>Fig. S3</b> BSA TIC electropherograms with and without a pepsin-containing membrane in the emitter tip. The figure shows limited broadening of the peak with the membrane in place. ....                                                                                                                                                                                                                                                                                                                               | S6 |
| <b>Table S3</b> Sequence coverages and numbers of unique peptides for each individual emitter tip and replicate injections in the analysis of a six-protein mixture. *For Tip 4 replicates 1 and 2 were stopped at 30 minutes and only partially captured the migration of insulin, so these points were not included in the averages.....                                                                                                                                                                                | S6 |
| <b>Fig. S4</b> Mass spectrum of $\alpha$ -lactalbumin after CE separation and online passage through a pepsin-containing membrane. Peaks labelled with asterisks stem from intact protein and exhibit high charge states. Peptides are present as well and show lower charge states ( $z = 2$ or $3$ ).....                                                                                                                                                                                                               | S7 |
| <b>Fig. S5</b> Mass spectrum of myoglobin after CE separation and online passage through a pepsin-containing membrane. Intact protein is not present, and only peptides are apparent. ....                                                                                                                                                                                                                                                                                                                                | S7 |
| <b>Fig. S6</b> Mass spectrum of myoglobin after CE separation without digestion. ....                                                                                                                                                                                                                                                                                                                                                                                                                                     | S7 |
| <b>Fig. S7</b> TIC electropherograms of a six-protein mixture separated with CE. A. Separation of unreduced protein in 10 mM ABC. B. Separation of protein after acetic acid and TCEP-HCL denaturing and reduction. In B, the sample was dried after reduction and reconstituted in 10 mM ABC. The low resolution in B likely results from interaction of proteins with each other or the capillary wall. TCEP migrates much faster than proteins, so it should not interfere with the analyses.....                      | S8 |
| <b>Table S4</b> Sequence Coverages for BSA at various injection volumes (different injection times) when using a sheath fluid composition of 10% methanol, 0.1% FA in water with and without 1mM TCEP. As a reducing agent, TCEP might reduce disulfide bonds to aid in identifying proteolytic peptides. Higher concentrations of TCEP were not tested due to instrument fouling when constantly spraying nonvolatile salts. Peptide matching was performed using MaxQuant searched against a database of BSA only. .... | S9 |

**Fig. S8** XIEs for all peptides matching to myoglobin. Peptides outside the acceptable migration time window for myoglobin are highlighted in red. The TIC is shown at the top and bottom for reference. XIEs are labelled with their m/z values. .... S10

**Table S5** Peptides identified from carbonic anhydrase II with sequences, matching scores ( $-10 \log P$ ), m/z values, migration times (MT), and intensities for each. Peptides with an inconsistent migration time are highlighted in red..... S12

**Fig. S9** XIEs for all peptides matching to carbonic anhydrase II. The TIC is shown at the top and bottom for reference. XIEs are labelled with their m/z values..... S13

**Fig. S10** MS/MS spectrum of m/z= 437.73 labelled with matching b and y ions highlighted in blue for myoglobin (determined by Peaks) and red for carbonic anhydrase II (determined by hand). The possible peptide squences are NAWGKVEA for myoglobin and QSPVDIDT for carbonic anhydrase II.....S16

**Table S1.** Average intensities for a BSA peptide obtained from online digestion using a pepsin-containing membrane in the emitter tip. The emitter tip final diameter was varied between 15 and 60  $\mu\text{m}$ , and 4 emitter tips were tested for each diameter range.

| Tip Size                        | 15-20 $\mu\text{m}$ | 30-35 $\mu\text{m}$ | 50-60 $\mu\text{m}$ |
|---------------------------------|---------------------|---------------------|---------------------|
| Average Intensity $\times 10^8$ | $1.9 \pm 0.31$      | $2.3 \pm 0.063$     | $0.47 \pm 0.11$     |

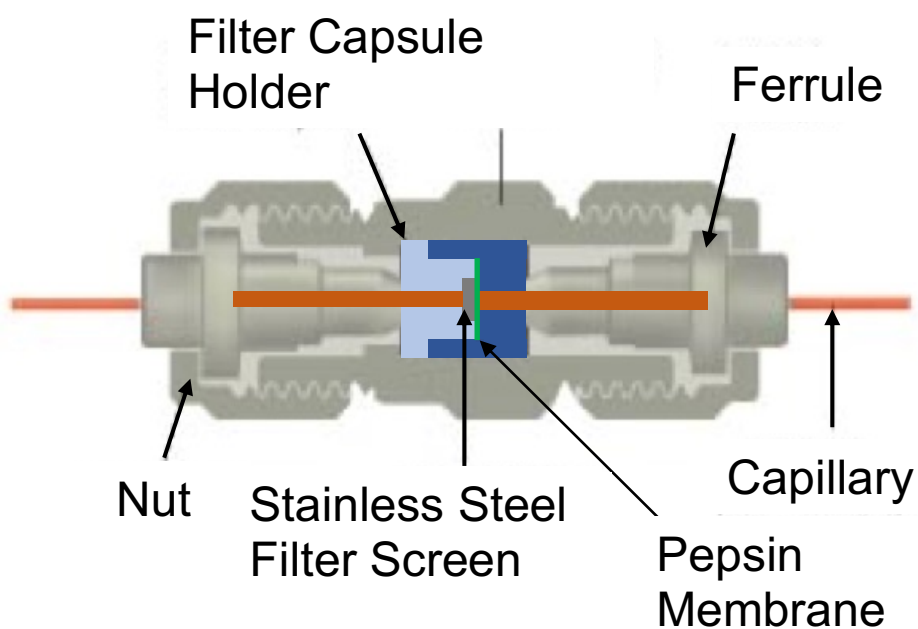

**Fig. S1** IDEX M-533 mini microfilter assembly modified to contain a membrane in the filter capsule for integration into 360  $\mu\text{m}$  od capillaries for CE separation. The figure is adapted from IDEX published sales literature.<sup>49</sup>

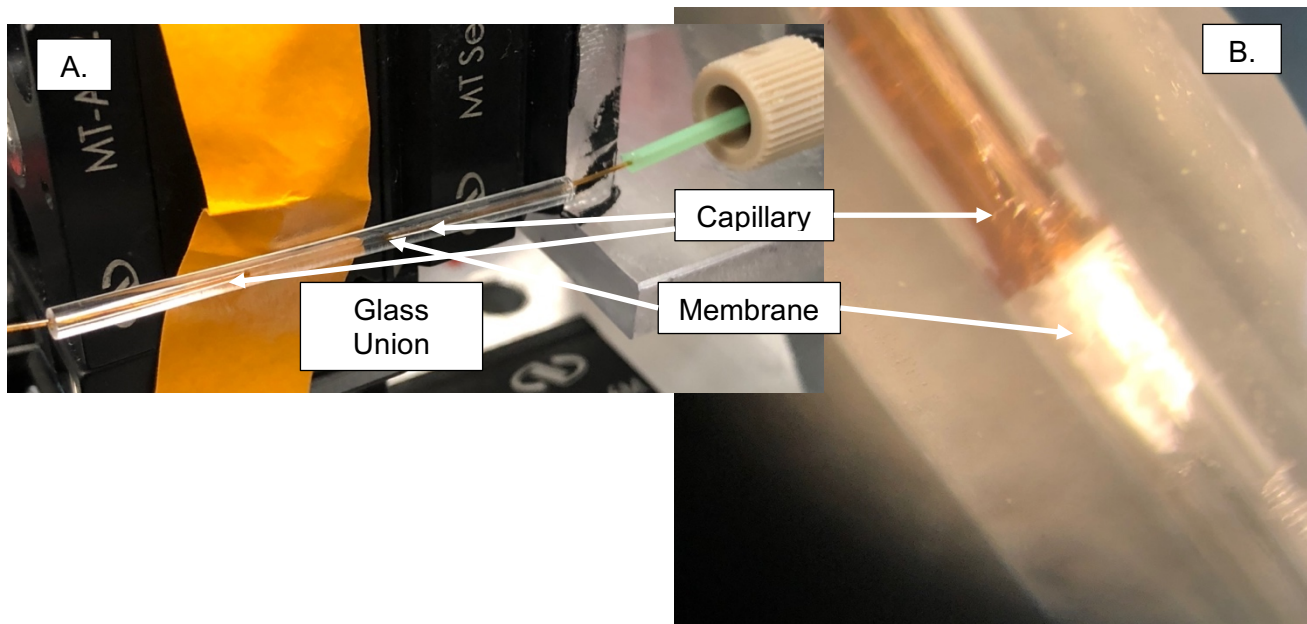

**Fig. S2** A. Glass capillary union packed with a pepsin membrane to digest proteins in-line with a CE separation. This setup yielded an unacceptably high EOF. B. Close-up view of the membrane packed into the glass union. A second capillary farther down in the union links the membrane and digested proteins to the sheath-flow ESI source.

**Table S2** Myoglobin sequence coverages and numbers of identified unique peptides for 20 repeat CE injections of intact equine myoglobin with all analyses using the same pepsin-containing emitter tip. A blank wash was run after the 20<sup>th</sup> injection. The table also shows the sequence coverage and number of identified peptides for pepsin, which may elute from the membrane in the emitter tip.

| Run # | Myoglobin Matches |            | Pepsin Matches    |            |
|-------|-------------------|------------|-------------------|------------|
|       | Sequence Coverage | # Peptides | Sequence Coverage | # Peptides |
| 1     | 63%               | 7          | 22%               | 9          |
| 2     | 87%               | 11         | 13%               | 5          |
| 3     | 87%               | 12         | 11%               | 4          |
| 4     | 63%               | 9          | 5%                | 2          |
| 5     | 87%               | 21         | 5%                | 3          |
| 6     | 87%               | 18         | 5%                | 2          |
| 7     | 87%               | 20         | 8%                | 3          |
| 8     | 87%               | 21         | 5%                | 2          |
| 9     | 87%               | 21         | 5%                | 2          |
| 10    | 87%               | 23         | 5%                | 2          |
| 11    | 87%               | 21         | 5%                | 2          |
| 12    | 90%               | 25         | 5%                | 2          |
| 13    | 90%               | 23         | 5%                | 2          |
| 14    | 90%               | 26         | 5%                | 2          |
| 15    | 90%               | 26         | 5%                | 2          |
| 16    | 90%               | 28         | 5%                | 2          |
| 17    | 90%               | 26         | 5%                | 2          |
| 18    | 90%               | 26         | 5%                | 2          |
| 19    | 90%               | 28         | 5%                | 2          |
| 20    | 87%               | 25         | 5%                | 2          |
| Wash  | 0%                | 0          | 5%                | 2          |

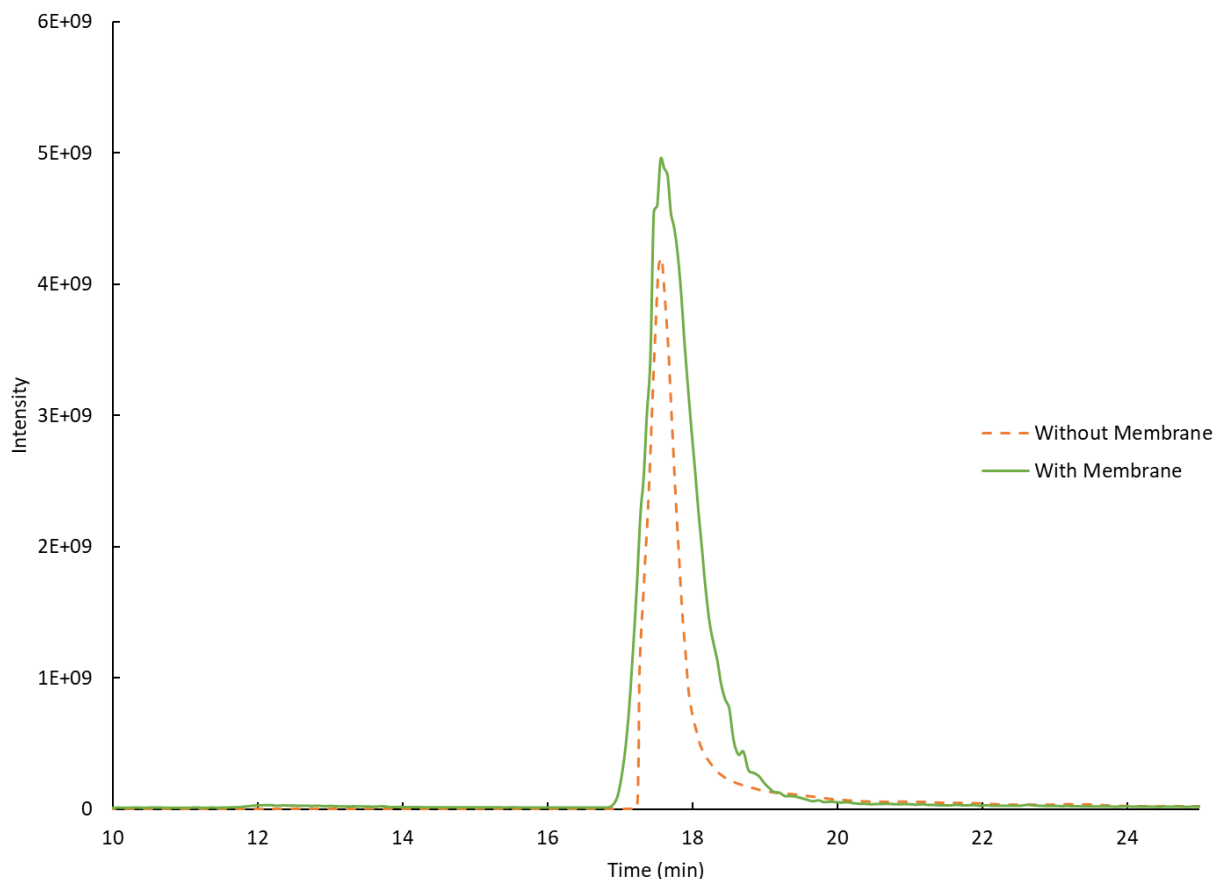

**Fig. S3** BSA TIC electropherograms with and without a pepsin-containing membrane in the emitter tip. The figure shows limited broadening of the peak with the membrane in place.

**Table S3** Sequence coverages and numbers of unique peptides for each individual emitter tip and replicate injections in the analysis of a six-protein mixture. \*For Tip 4 replicates 1 and 2 were stopped at 30 minutes and only partially captured the migration of insulin, so these points were not included in the averages.

|                                                         |       | Ribonuclease B |          | $\alpha$ -lactalbumin |          | Insulin  |          | Serum Albumin |          | Carbonic Anhydrase II |          | Myoglobin |          |
|---------------------------------------------------------|-------|----------------|----------|-----------------------|----------|----------|----------|---------------|----------|-----------------------|----------|-----------|----------|
|                                                         |       | Peptides       | Coverage | Peptides              | Coverage | Peptides | Coverage | Peptides      | Coverage | Peptides              | Coverage | Peptides  | Coverage |
| Tip 1                                                   | Rep 1 | 4              | 21%      | 8                     | 51%      | 3        | 22%      | 5             | 14%      | 29                    | 86%      | 17        | 99%      |
|                                                         | Rep 2 | 2              | 11%      | 5                     | 27%      | 2        | 19%      | 7             | 11%      | 9                     | 56%      | 12        | 75%      |
|                                                         | Rep 3 | 3              | 18%      | 7                     | 56%      | 2        | 13%      | 7             | 14%      | 22                    | 89%      | 22        | 99%      |
| Tip 2                                                   | Rep 1 | 5              | 26%      | 6                     | 32%      | 5        | 69%      | 8             | 22%      | 21                    | 72%      | 28        | 99%      |
|                                                         | Rep 2 | 4              | 21%      | 10                    | 51%      | 7        | 59%      | 8             | 23%      | 29                    | 94%      | 25        | 99%      |
|                                                         | Rep 3 | 4              | 23%      | 8                     | 58%      | 4        | 59%      | 13            | 43%      | 20                    | 81%      | 25        | 99%      |
| Tip 3                                                   | Rep 1 | 5              | 26%      | 5                     | 40%      | 2        | 19%      | 9             | 24%      | 28                    | 82%      | 21        | 99%      |
|                                                         | Rep 2 | 3              | 18%      | 4                     | 35%      | 1        | 10%      | 6             | 19%      | 18                    | 70%      | 19        | 99%      |
|                                                         | Rep 3 | 3              | 18%      | 3                     | 35%      | 1        | 10%      | 2             | 7%       | 12                    | 75%      | 13        | 99%      |
| Tip 4                                                   | Rep 1 | 3              | 17%      | 8                     | 38%      | *        | *        | 5             | 11%      | 25                    | 62%      | 8         | 55%      |
|                                                         | Rep 2 | 3              | 17%      | 7                     | 27%      | *        | *        | 4             | 11%      | 30                    | 70%      | 12        | 75%      |
|                                                         | Rep 3 | 3              | 18%      | 5                     | 22%      | 2        | 37%      | 6             | 13%      | 25                    | 60%      | 15        | 75%      |
| <b>Combined</b>                                         |       | 5              | 26%      | 11                    | 77%      | 14       | 69%      | 37            | 67%      | 63                    | 96%      | 44        | 100%     |
| Median Number of Peptides and Average Sequence Coverage |       | 3              | 20%      | 6.5                   | 39%      | 2        | 32%      | 6.5           | 18%      | 23.5                  | 75%      | 18        | 89%      |
| Standard Deviation                                      |       |                | 4%       |                       | 12%      |          | 22%      |               | 10%      |                       | 12%      |           | 15%      |

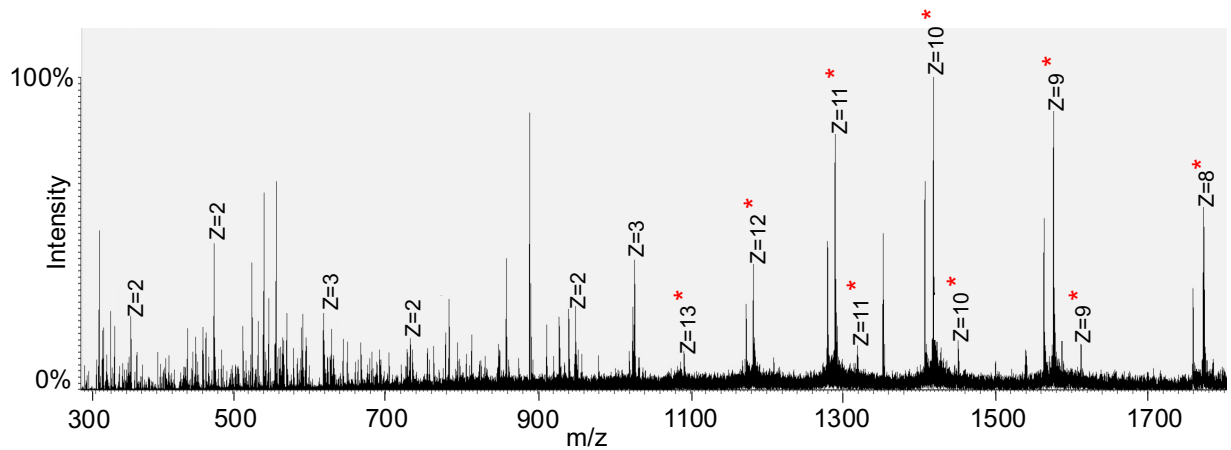

**Fig. S4** Mass spectrum of  $\alpha$ -lactalbumin after CE separation and online passage through a pepsin-containing membrane. Peaks labelled with asterisks stem from intact protein and exhibit high charge states. Peptides are present as well and show lower charge states ( $z = 2$  or  $3$ ).

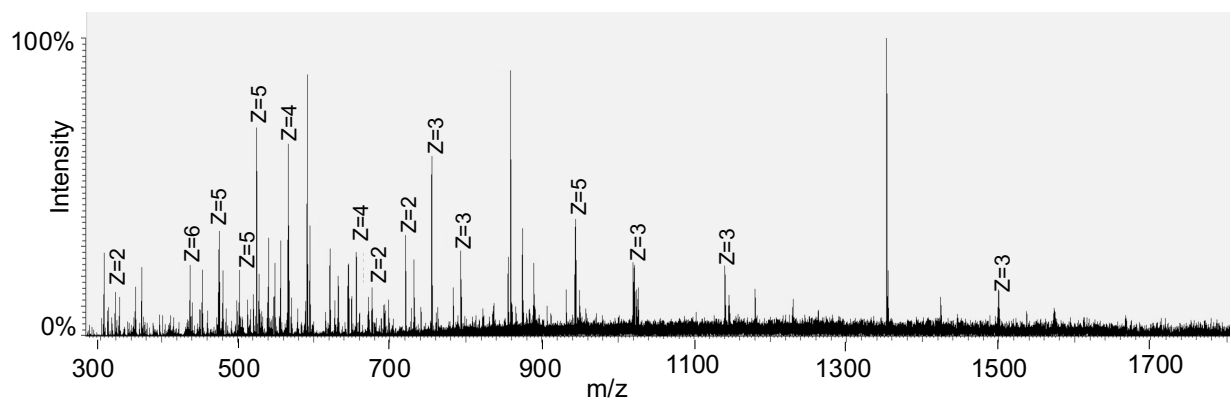

**Fig. S5** Mass spectrum of myoglobin after CE separation and online passage through a pepsin-containing membrane. Intact protein is not present, and only peptides are apparent. Fig. S6 shows the expected spectrum if intact myoglobin was present.

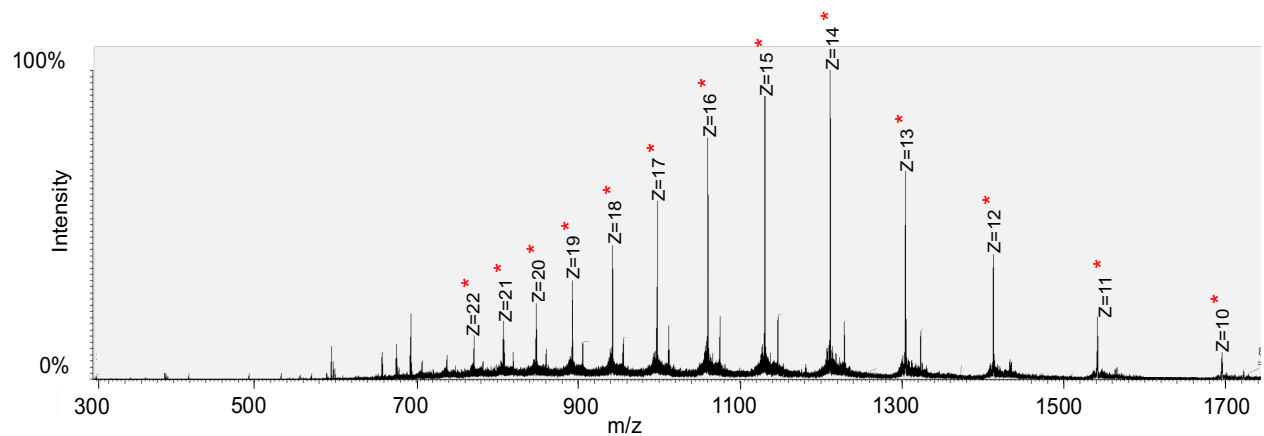

**Fig. S6** Mass spectrum of myoglobin after CE separation without digestion.

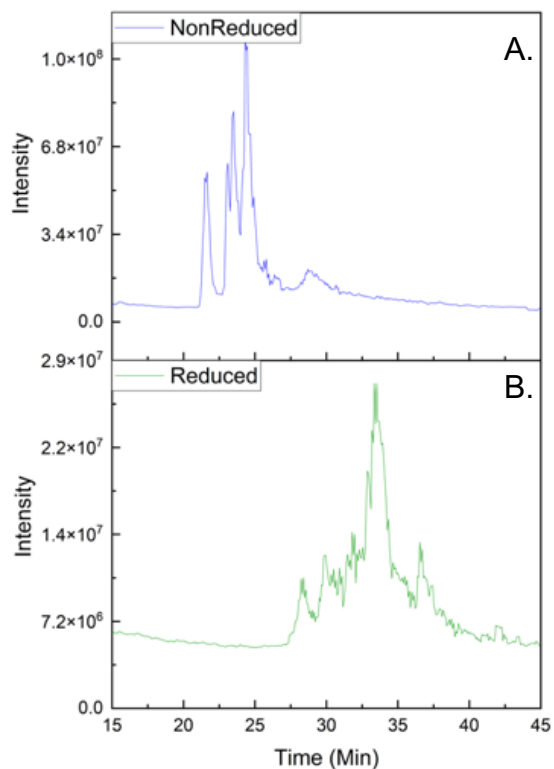

**Fig. S7** TIC electropherograms of a six-protein mixture separated with CE. A. Separation of unreduced protein in 10 mM ABC. B. Separation of protein after acetic acid and TCEP-HCL denaturing and reduction. In B, the sample was dried after reduction and reconstituted in 10 mM ABC. The low resolution in B likely results from interaction of proteins with each other or the capillary wall. TCEP migrates much faster than proteins, so it should not interfere with the analyses.



**Table S4** Sequence coverages for BSA at various injection volumes (different injection times) when using an aqueous sheath fluid with and without 1 mM TCEP. The sheath fluid contained 10% methanol, and 0.5% FA, and the experiments employed a pepsin-containing membrane in the emitter tip. As a reducing agent, TCEP might break disulfide bonds to aid in identifying proteolytic peptides. Higher concentrations of TCEP were not tested due to instrument fouling when constantly spraying nonvolatile salts. Peptide matching was performed using MaxQuant searched against a database of BSA only.

|                       | <b>Sequence Coverage</b> |                 |
|-----------------------|--------------------------|-----------------|
| <b>Injection Time</b> | <b>No TCEP</b>           | <b>1mM TCEP</b> |
| 5s                    | 17.6%                    | 17.3%           |
| 10s                   | 26.4%                    | 27.2%           |
| 20s                   | 57.8%                    | 47.1%           |

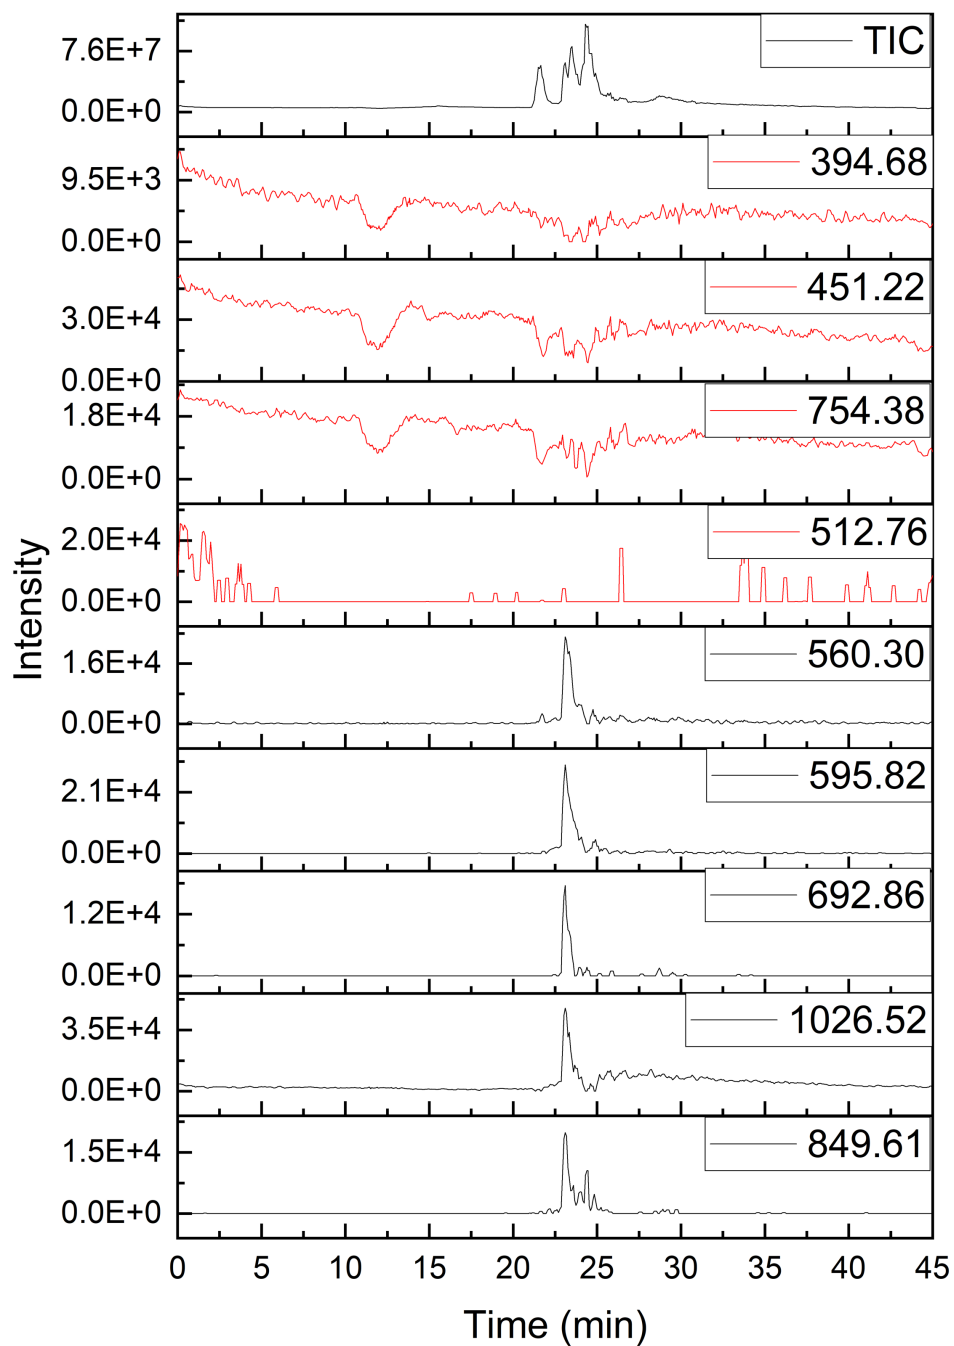

**Fig. S8** XIEs for all peptides matching to myoglobin. Peptides outside the acceptable migration time window for myoglobin are highlighted in red. The TIC is shown at the top for reference. XIEs are labelled with their m/z values.

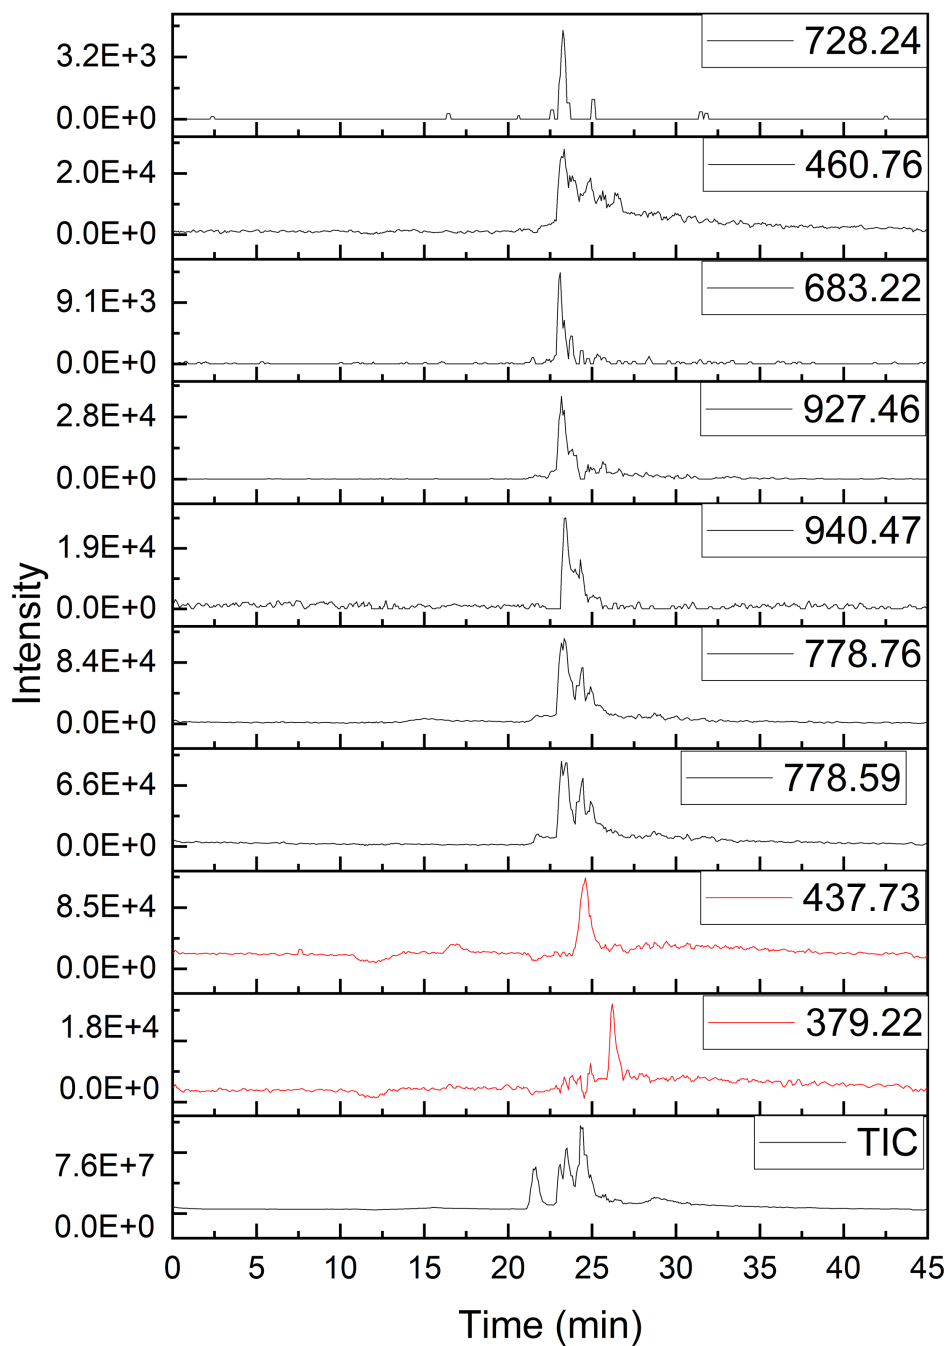

**Fig. S8 (continued)** XIEs for all peptides matching to myoglobin. Peptides outside the acceptable migration time window for myoglobin are highlighted in red. The TIC is shown at the bottom for reference. XIEs are labelled with their m/z values.

**Table S5** Peptides identified from carbonic anhydrase II with sequences, matching scores (-10 log P), m/z values, migration times (MT), and intensities for each. Peptides with an inconsistent migration time are highlighted in red.

| Peptide                                                 | -10LgP | m/z      | MT    | Intensity |
|---------------------------------------------------------|--------|----------|-------|-----------|
| F.LKVG DAN.P                                            | 25.69  | 358.7006 | 0.17  | 5.25E+05  |
| D.PALKPLAL.V                                            | 20.36  | 411.7768 | 0.17  | 1.31E+07  |
| G.ERQSPVD.I                                             | 30.28  | 415.7043 | 0.17  | 9.38E+05  |
| L.LM(+15.99)LANWRPAQPLKNRQVRGFPK                        | 49.96  | 528.1028 | 24.39 | 5.15E+05  |
| A.NWRPAQPLKNRQVRGFPK                                    | 65     | 548.8151 | 24.46 | 4.32E+06  |
| L.ANWRPAQPLKNRQVRGFPK                                   | 102.95 | 566.5759 | 24.46 | 1.86E+08  |
| M.LANWRPAQPLKNRQVRGFPK                                  | 80.77  | 594.847  | 24.46 | 8.99E+07  |
| L.MLANWRPAQPLKNRQVRGFPK                                 | 62.85  | 502.2871 | 24.46 | 3.66E+07  |
| W.IVLKEPISVSSQQM(+15.99)LKFRTLNF.N                      | 27.33  | 649.3695 | 24.53 | 2.77E+05  |
| L.LMLANWRPAQPLKNRQVRGFPK                                | 68.64  | 524.9043 | 24.53 | 2.05E+08  |
| W.IVLKEPISVSSQQMLKFRTLNFNAEGEPE<br>L.L                  | 70.34  | 1139.947 | 24.61 | 6.74E+05  |
| Q.PLKNRQVRGFPK                                          | 59.73  | 720.4365 | 24.68 | 4.44E+06  |
| W.IVLKEPISVSSQQMLKFRTLNF.N                              | 80.5   | 645.3687 | 24.68 | 6.65E+07  |
| F.LKVG DANPALQKVL DALDSIKTKGKSTDF<br>PNFDP GSLLPNVLDY.W | 90.57  | 943.71   | 24.68 | 1.87E+08  |
| T.KAVVQDPALKPLAL.V                                      | 68.57  | 731.9557 | 24.91 | 3.95E+05  |
| F.LKVG DANPALQKVL DAL.D                                 | 69.17  | 883.0175 | 24.91 | 2.41E+07  |
| L.VYGEATSRRMVNNGH SFNVEYDDSDKA<br>VLKDGPLTGT.Y          | 97.01  | 835.0029 | 24.91 | 3.11E+07  |
| A.VVQDPALKPLAL.V                                        | 61.4   | 632.3885 | 25.8  | 1.18E+08  |
| W.IVLKEPISVSSQQ.M                                       | 70.5   | 714.4097 | 25.8  | 1.12E+07  |
| F.NVEYDDSDKAVLKDGPLTGT.Y                                | 77.14  | 1133.05  | 25.8  | 1.49E+06  |
| F.NVEYDDSDKAVL.K                                        | 52.74  | 748.35   | 26.53 | 3.76E+06  |
| F.LKVG DANPAL.Q                                         | 47.81  | 499.2888 | 28.23 | 6.84E+07  |
| W.IVLKEPISV.S                                           | 35.23  | 499.3183 | 29.28 | 1.92E+07  |
| L.QKVL DAL.D                                            | 19.1   | 393.74   | 30.67 | 2.86E+05  |
| L.KDGPLTGT.Y                                            | 52.21  | 394.7113 | 30.67 | 1.34E+07  |
| W.IVLKEPIS.V                                            | 41.58  | 449.7848 | 30.67 | 1.53E+07  |
| E.YDDSDKAVL.K                                           | 59.48  | 1153.539 | 30.67 | 1.24E+06  |

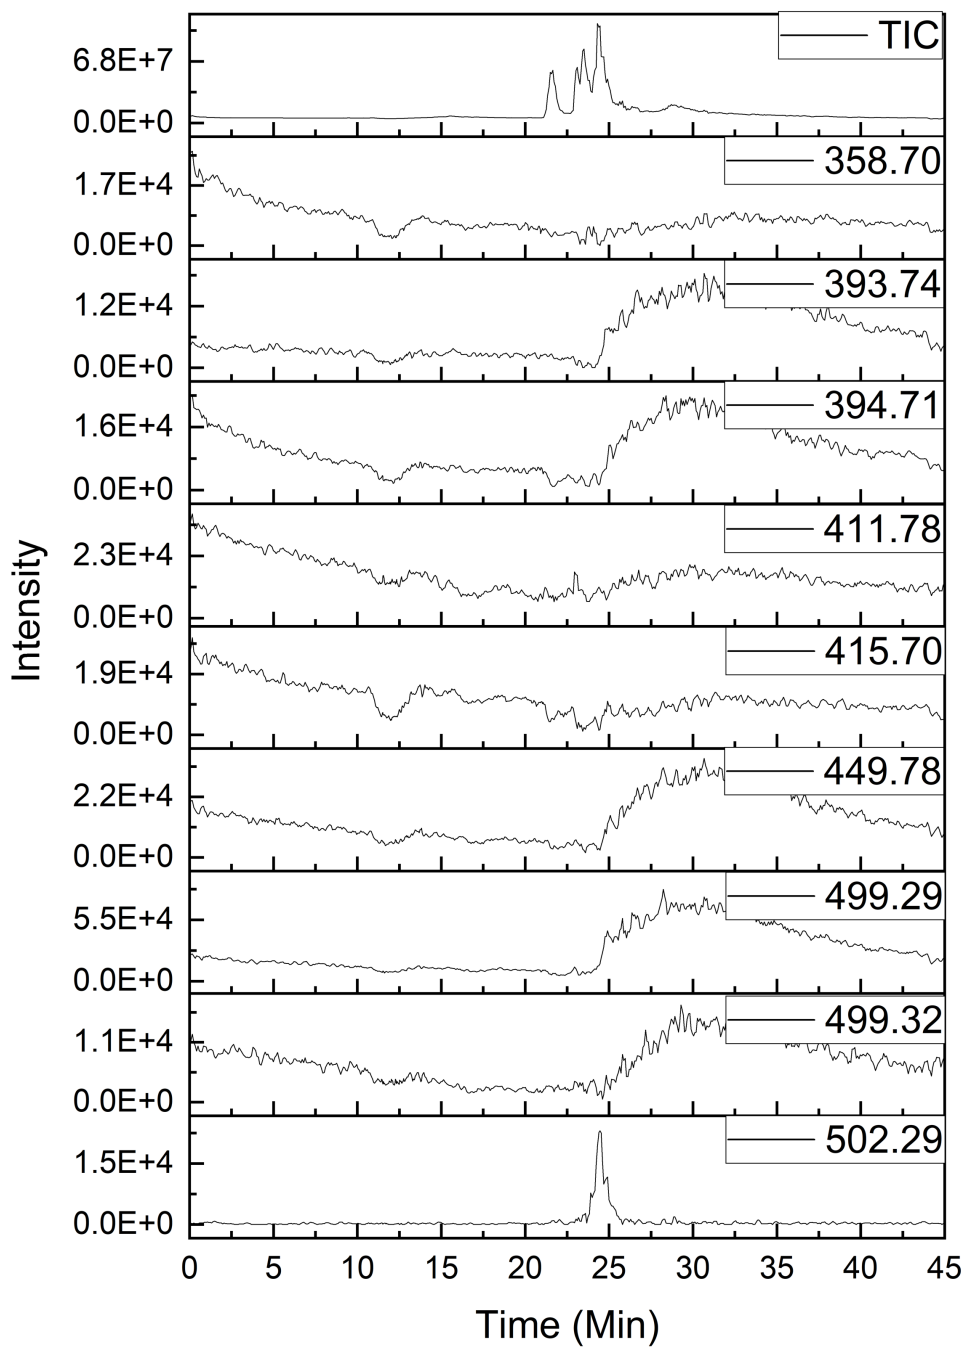

**Fig. S9** XIEs for all identified peptides for carbonic anhydrase II. The TIC is shown at the top for reference. XIEs are labelled with their m/z values.

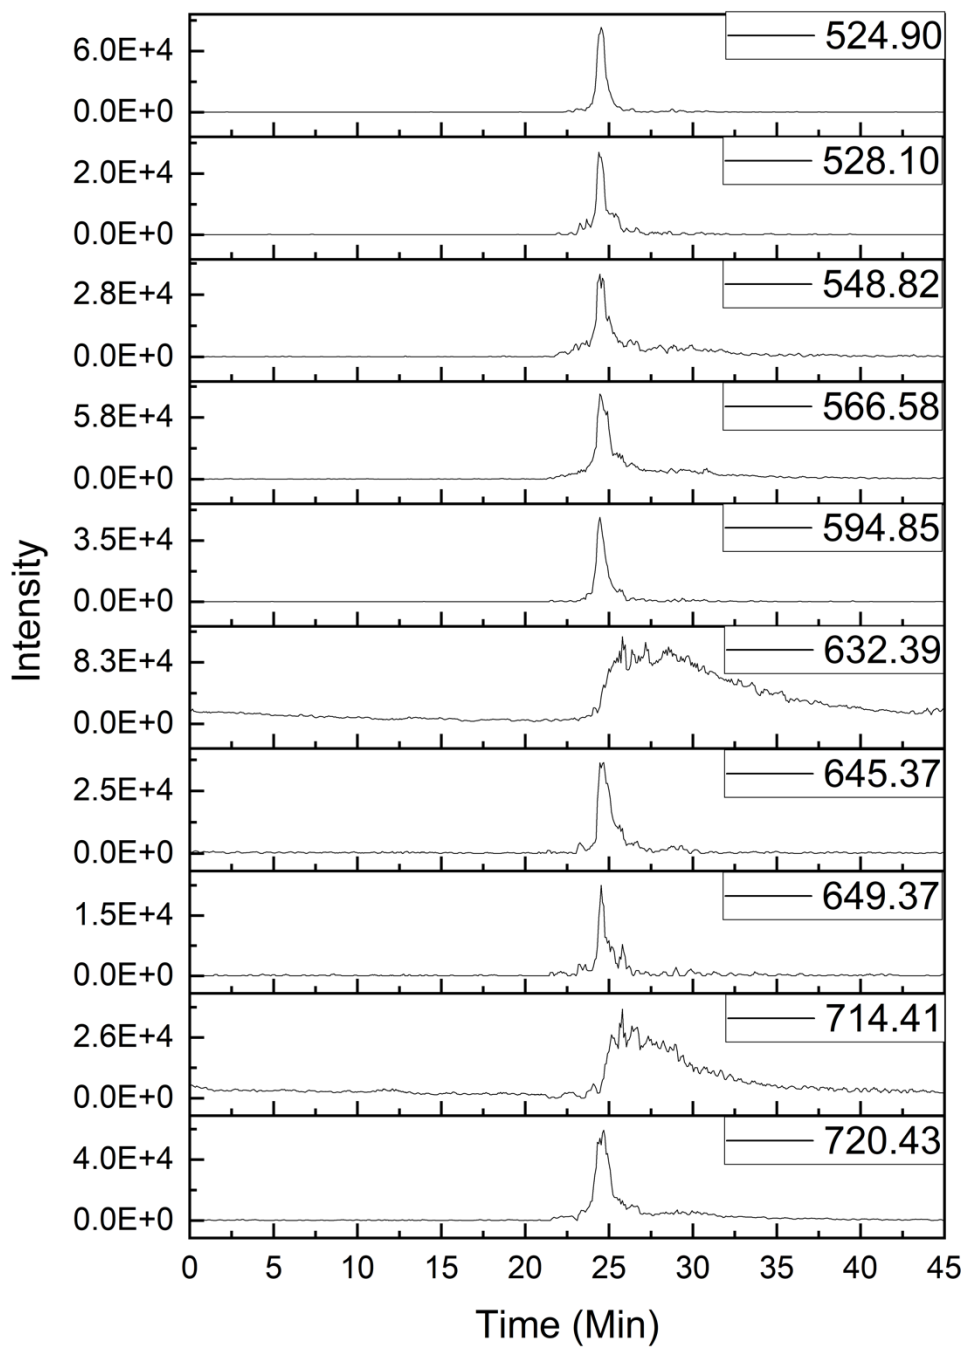

**Fig. S9 (continued)** XIEs for all identified peptides for carbonic anhydrase II. XIEs are labelled with their m/z values.

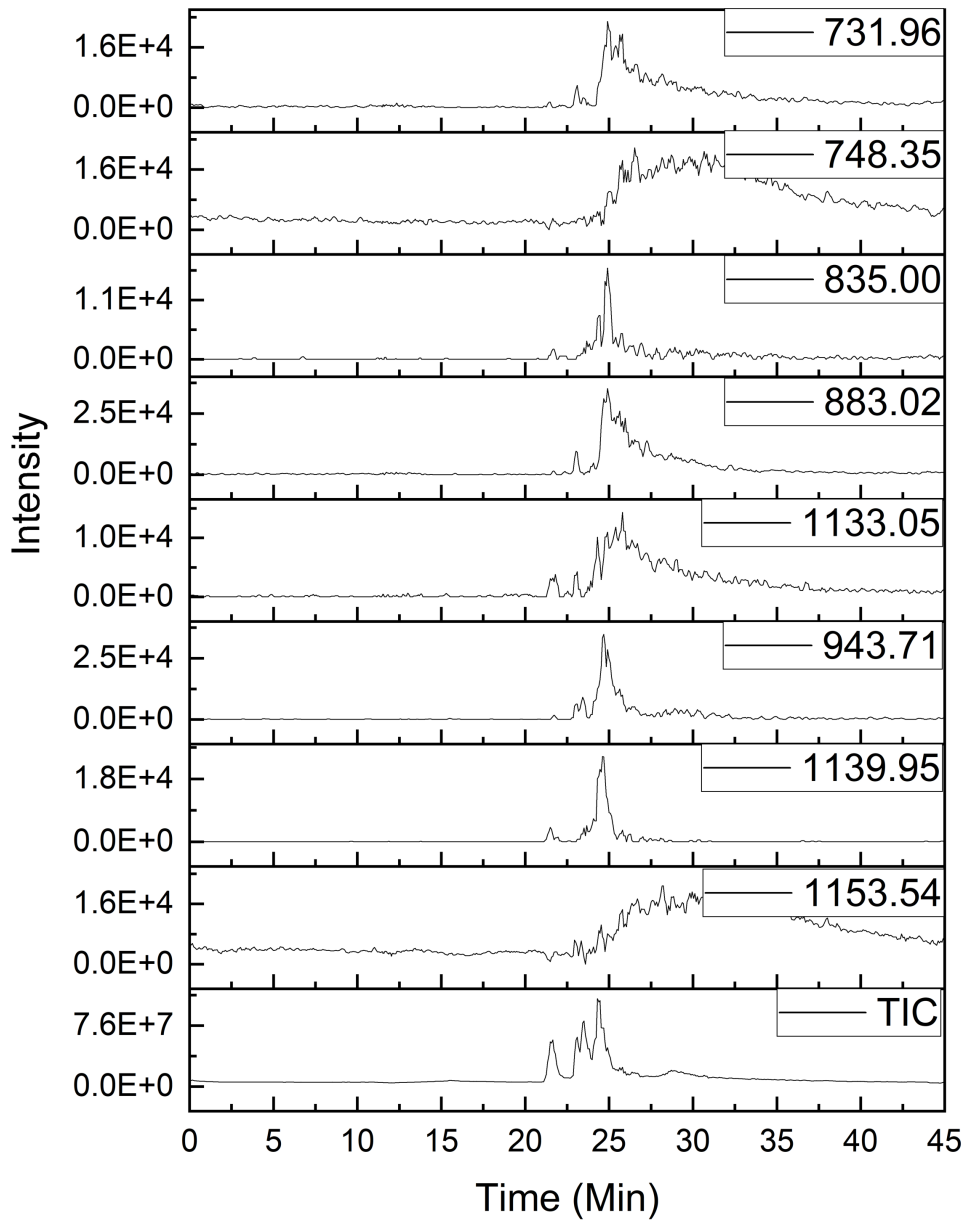

**Fig. S9 (continued)** XIEs for all identified peptides for carbonic anhydrase II. The TIC is shown at the bottom for reference. XIEs are labelled with their m/z values.

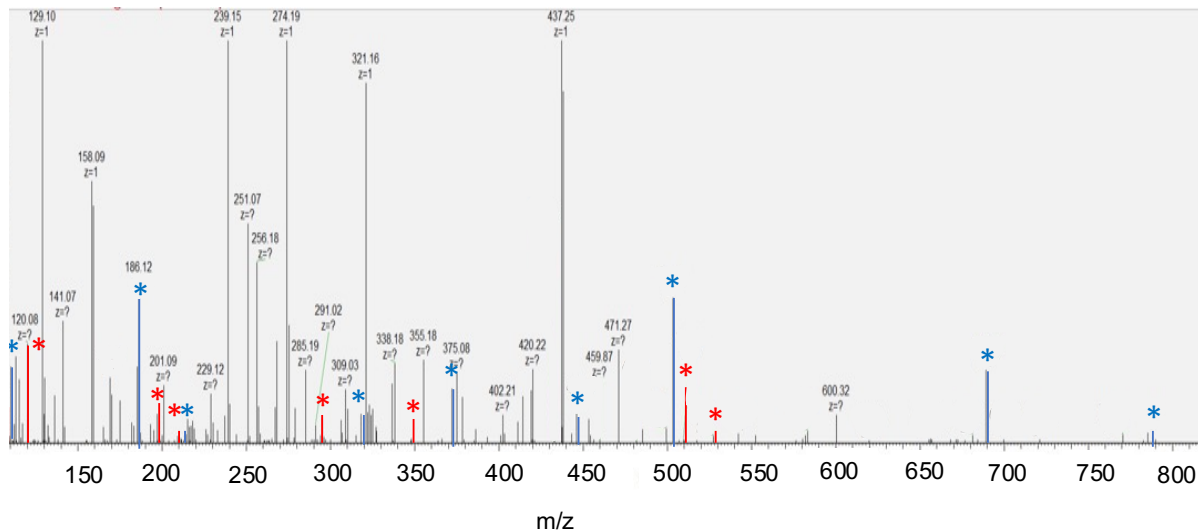

**Fig. S10** MS/MS spectrum of  $m/z = 437.73$  labelled with matching b and y ions highlighted in blue for myoglobin (determined by Peaks) and red for carbonic anhydrase II (determined by hand). The possible peptide sequences are NAWGKVEA for myoglobin and QSPVDIDT for carbonic anhydrase II.

#### Data File Submission

Raw data files were submitted to the MassIVE database. Private access can be found using the URL <ftp://MSV000091085@massive.ucsd.edu> and password; Membrane. Upon public submission the URL will change to <ftp://massive.ucsd.edu/MSV000091085/>.
